# Supplementary material for: Amplification biases: possible differences among deviating gene expressions
Source: Springer Nature journal article supplement (doi:10.1186/1471-2164-9-46), 2008-01-28
Supplement: Additional file 4 [file 1471-2164-9-46-s4.pdf]

**45 EST from Panel 2**

| 1K array EST       | GenBank  | TIGR     | Bt.Unigene | Gene ID     |
|--------------------|----------|----------|------------|-------------|
| bcai0001a.c.04_5.1 | CR451497 | TC264955 | .          | ARF3_RAT    |
| bcai0001a.d.01_5.1 | CR455381 | .        | Bt.14228   | AB098876    |
| bcai0001a.e.01_5.1 | CR455253 | TC274814 | Bt.24696   | Bt.24696    |
| bcai0001a.g.05_5.1 | CR450976 | TC262815 | Bt.9548    | RL39 ICTPU  |
| bcai0002a.b.02_5.1 | CR453126 | TC263978 | Bt.15779   | KRAC_DICDI  |
| bcai0002a.b.06_5.1 | CR453147 | TC292763 | Bt.22027   | Bt.22027    |
| bcai0002a.c.03_5.1 | CR451211 | TC294446 | .          | Bt.25225    |
| bcai0002a.c.09_5.1 | CR451254 | TC279709 | Bt.28502   | CT129_HUMAN |
| bcai0002a.d.02_5.1 | CR455018 | TC292235 | Bt.15307   | Bt.15307    |
| bcai0002a.e.01_5.1 | CR451077 | TC261729 | .          | TF1B_HUMAN  |
| bcai0002a.g.10_5.1 | CR455314 | TC264574 | Bt.27027   | RT15_HUMAN  |
| bcai0003a.e.01_5.1 | CR451392 | TC261729 | .          | TF1B_HUMAN  |
| bcai0003a.f.08_5.1 | CR451402 | TC293505 | .          | Bt.33879    |
| bcai0003a.g.06_5.1 | CR451367 | TC288058 | .          | AT8A1_BOVIN |
| bcai0003a.h.07_5.1 | CR451372 | TC263422 | Bt.4339    | CT027_HUMAN |
| bcai0004a.g.06_5.1 | CR451104 | TC295528 | Bt.39526   | Hs.54037    |
| bcai0005a.d.02_5.1 | CR451058 | TC294102 | Bt.14278   | BCLF1_HUMAN |
| bcai0005a.f.06_5.1 | CR451073 | .        | Bt.41670   | DHBX_ANAPL  |
| bcai0005a.h.07_5.1 | CR455051 | TC262815 | Bt.9548    | RL39 ICTPU  |
| bcai0006a.c.02_5.1 | CR455030 | TC290668 | Bt.3254    | PAC2_YEAST  |
| bcai0007a.c.08_5.1 | CR451235 | .        | .          | EFB2_MOUSE  |
| bcai0007a.d.04_5.1 | CR451241 | TC262735 | Bt.26365   | TKDP1_SHEEP |
| bcai0007a.h.10_5.1 | CR451196 | .        | .          | Bt.33716    |
| bcai0008a.e.04_5.1 | CR942251 | TC278354 | Bt.4702    | Bt.4702     |
| bcai0008a.g.10_5.1 | CR453150 | TC288058 | .          | AT8A1_BOVIN |
| bcai0008a.h.01_5.1 | CR453153 | TC260381 | Bt.4942    | SERF2_MOUSE |
| bcai0009a.a.07_5.1 | CR453166 | TC267531 | Bt.41668   | 140U_DROME  |
| bcai0009a.g.06_5.1 | CR453088 | TC264113 | Bt.25106   | YHH2_SCHPO  |
| bcai0009a.h.06_5.1 | CR453096 | TC264358 | Bt.3541    | Bt.3541     |
| bcai0010a.h.04_5.1 | CR450912 | .        | .          | Bt.19598    |
| bcai0011a.b.05_5.1 | CR450890 | .        | .          | Bt.33709    |
| bcai0012a.b.10_5.1 | CR451006 | TC288058 | .          | AT8A1_BOVIN |
| bcai0012a.e.05_5.1 | CR450983 | TC276987 | Bt.11242   | BR44L_HUMAN |
| bcai0012a.f.04_5.1 | CR450989 | .        | .          | Bt.16383    |
| bcai0013a.e.08_5.1 | CR451454 | TC260263 | .          | Bt.33708    |
| bcai0013a.h.10_5.1 | CR455178 | TC289262 | Bt.5535    | 1433B_HUMAN |
| bcai0016a.b.10_5.1 | CR455386 | TC280482 | .          | CEP27_HUMAN |
| bcai0016a.c.04_5.1 | CR455388 | TC290624 | Bt.4007    | HAX1_HUMAN  |
| bcai0016a.d.02_5.1 | CR455397 | .        | Bt.37972   | Hs.5737     |
| bcai0016a.g.05_5.1 | CR455426 | .        | Bt.28078   | Bt.6457     |
| bcai0017a.a.05_5.1 | CR451472 | TC261339 | Bt.4798    | ACOD_BOVIN  |
| bcai0017a.b.06_5.1 | CR451486 | TC266572 | Bt.22385   | MGN_XENLA   |
| bcai0018a.b.06_5.1 | CR451546 | TC289409 | Bt.435     | TIM2_BOVIN  |
| bcai0020a.g.09_5.1 | CR451288 | TC281068 | Bt.12850   | GLMN_HUMAN  |
| bcai0020a.h.09_5.1 | CR451295 | TC291677 | Bt.20133   | RBP6_HUMAN  |
